# Supplementary material for: CareTrack Australia: assessing the appropriateness of adult healthcare: protocol for a retrospective medical record review
Source: HighWire-hosted journal article supplement (doi:10.1136/bmjopen-2011-000665), 2012-01-01
Supplement: bmjopen-2011-000665-s8.pdf [file bmjopen-2011-000665-s8.pdf]

## Appendix 8 – Healthcare provider consent (medical records)

### SA HEALTHCARE PROVIDER CONSENT FORM

(Medical Records)

PT ID:

HCP ID:

Project title: CareTrack Australia

Researcher's name and contact details: Professor Bill Runciman

Patient Safety & Healthcare Human Factors –  
University of South Australia

Australian Institute of Health Care Innovation,  
Faculty of Medicine University of New South Wales

President – Australian Patient Safety Foundation

Tel: (08) 8302 1004  
Fax: (08) 8232 6938

- I have read the Healthcare Provider Information Sheet and understand the nature and purpose of the research project and my involvement in it and agree to take part
- I understand that I may withdraw from the research project at any stage and that this will not affect my status now or in the future.
- I understand that while information gained during the study may be published, I will not be identified and my personal results will remain confidential.
- I understand that a CareTrack Australia surveyor will require access to healthcare records to extract data. I have no objection to this.

**Name of healthcare provider**

**Signed**

**Dated**

**Address**

I have provided information about the research to the research participant and believe that he/she understands what is involved.

Researcher's signature and date

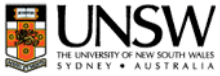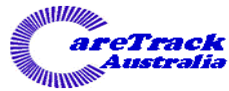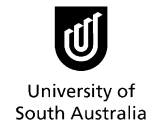

participant, please contact Associate Professor Simon Carney, Chairman SAFCHREC on 8204 4507 or email [research.ethics@health.sa.gov.au](mailto:research.ethics@health.sa.gov.au)
